# Supplementary material for: A highly selective fluorescent probe for in vitro and in vivo detection of Hg2+
Source: Royal Society of Chemistry journal article supplement (doi:10.1039/c5an00452g), 2015-01-01
Supplement: c5an00452g1.pdf [file c5an00452g1.pdf]

## Electronic Supplementary Information

# A highly selective fluorescent probe for *in vitro* and *in vivo* detection of Hg<sup>2+</sup>

Quan Zhou<sup>†</sup>, Zeming Wu<sup>†</sup>, Xiaohua Huang<sup>†</sup>, Fenfen Zhong<sup>†</sup>, Qingyun Cai<sup>†\*</sup>

<sup>†</sup>State Key Laboratory of Chemo/Biosensing and Chemometrics, College of Chemistry and Chemical Engineering, Hunan University, Changsha, 410082, China.

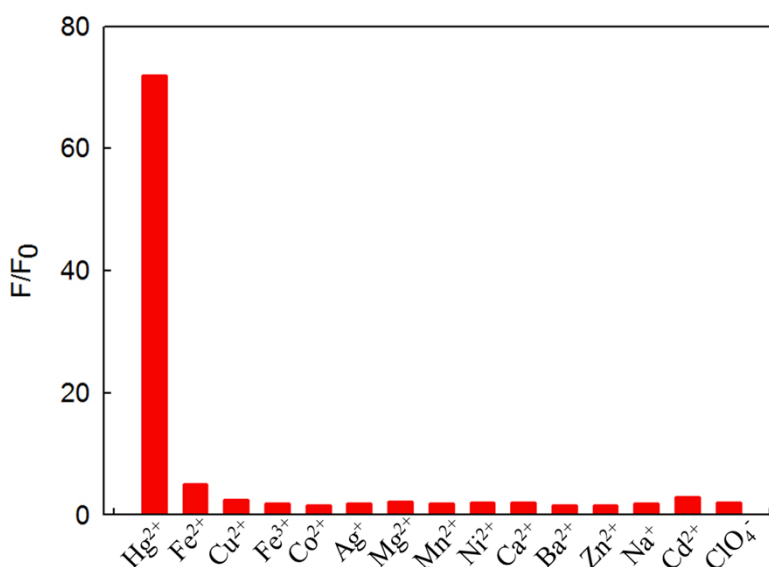

**Figure S1.** Fluorescence intensity changes of RS (10  $\mu$ M) in response to various metal species and ClO<sub>4</sub><sup>-</sup> (100  $\mu$ M) in CH<sub>3</sub>CN/H<sub>2</sub>O. Excitation at 500 nm; emission 587 nm.

\*Corresponding author. Tex.: +86-73188821848. E-mail: [qycal0001@hnu.edu.cn](mailto:qycal0001@hnu.edu.cn), [qycal0002@gmail.com](mailto:qycal0002@gmail.com).

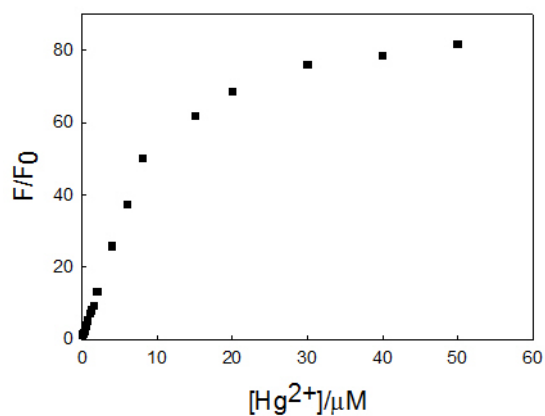

**Figure S2.** Plot of fluorescence intensity of RS (10  $\mu\text{M}$ ) as a function of added  $\text{Hg}^{2+}$  (0.1-50  $\mu\text{M}$ ) ( $\lambda_{\text{ex}} = 500 \text{ nm}$ ,  $\lambda_{\text{em}} = 587 \text{ nm}$ ).

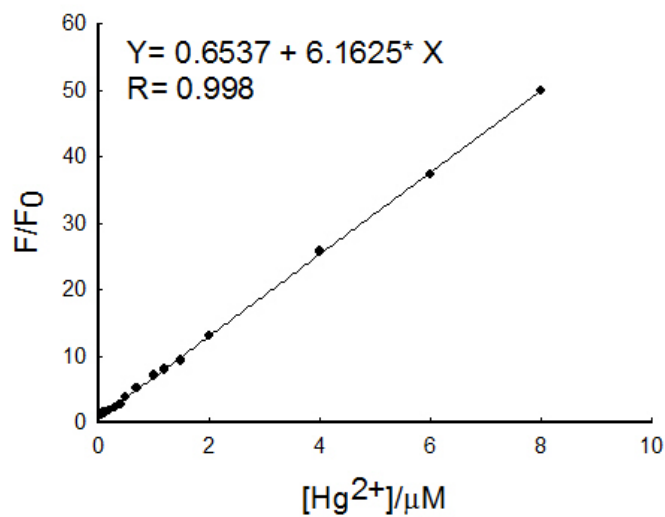

**Figure S3.** The linear equation of ratio of fluorescence and  $\text{Hg}^{2+}$  concentration.

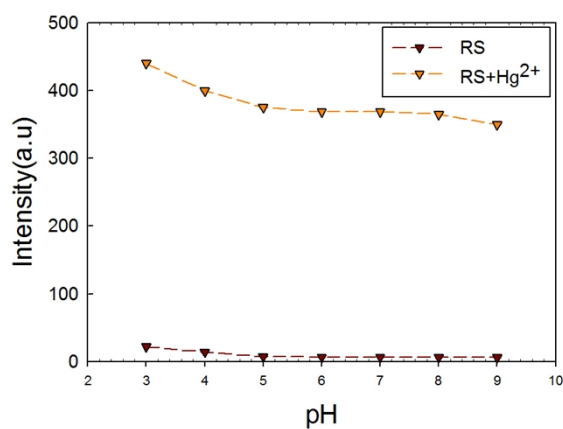

**Figure S4 .** Effect of pH on the emission intensity of free RS (10  $\mu\text{M}$ ) and  $[\text{Hg}^{2+}\text{-RS}]$  system (10:1, mole ratio,  $\lambda_{\text{ex}} = 500 \text{ nm}$ ,  $\lambda_{\text{em}} = 587 \text{ nm}$ )

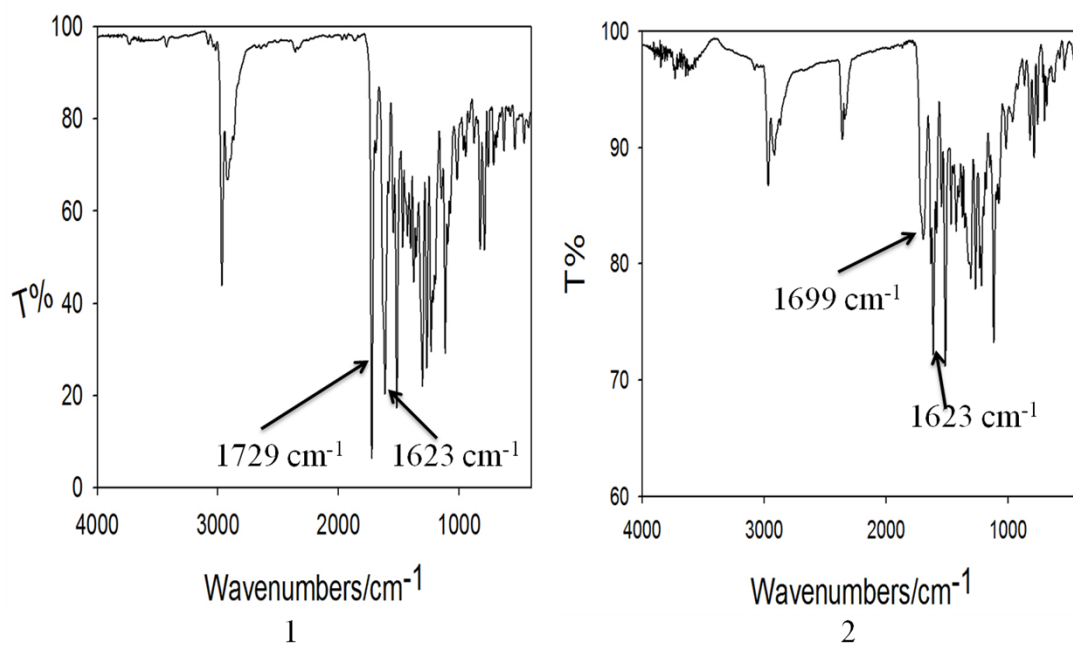

**Figure S5.** Infrared spectra of sensor RS (1), and sensor RS with 2.0 equiv. of Hg<sup>2+</sup> (2).

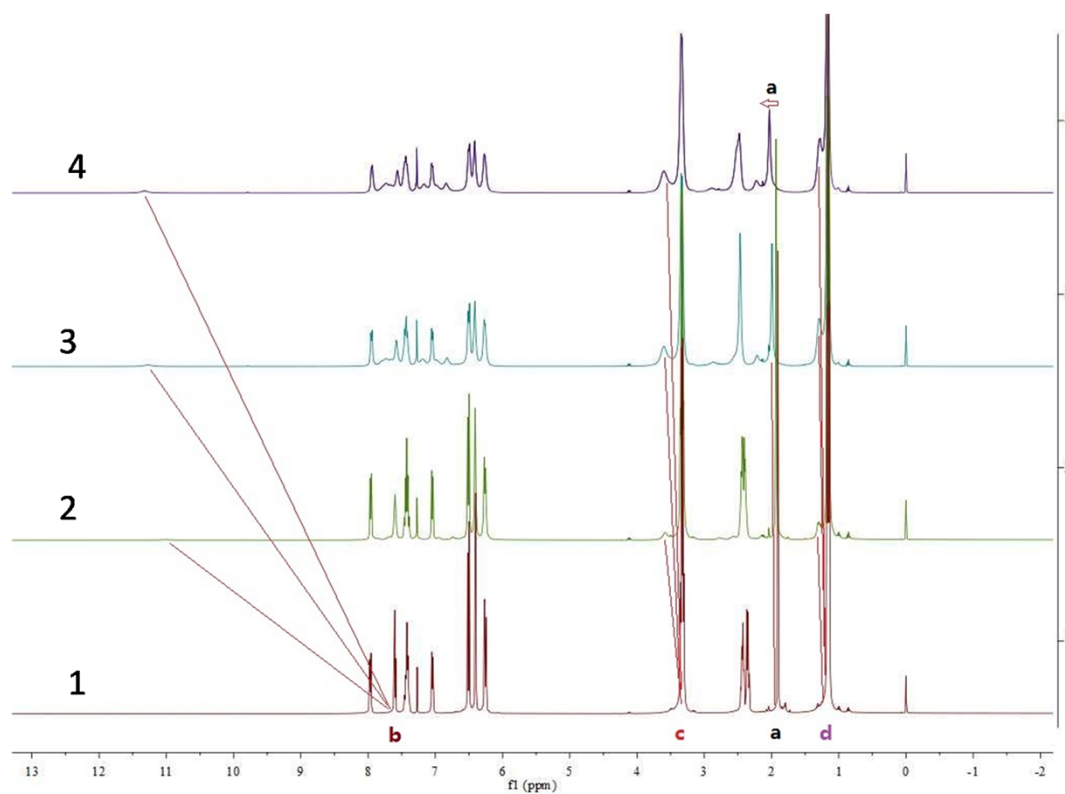

**Figure S6.** <sup>1</sup>H NMR spectra of RS (1), and RS after addition of 2.0 equiv. Hg(ClO<sub>4</sub>)<sub>2</sub> in CDCl<sub>3</sub> for 5 mins (2), 20 mins (3), and 30 mins (4).

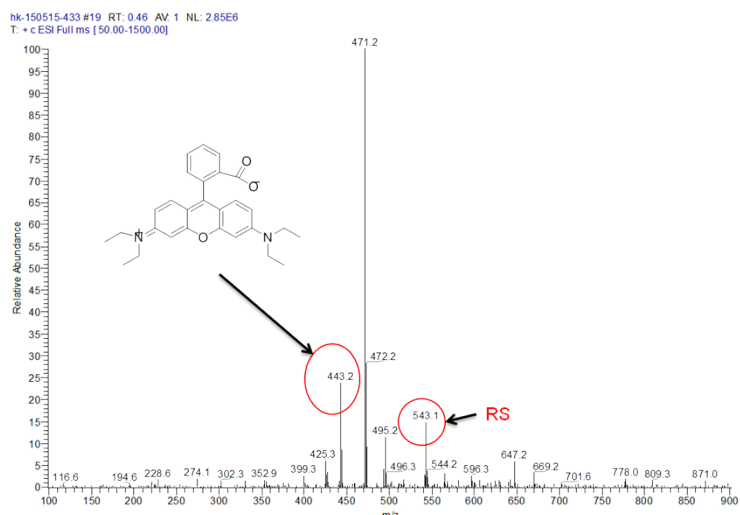

**Figure S7.** ESI-MS spectrum of the product formed after  $\text{Hg}^{2+}$  assisted hydrolysis of RS.

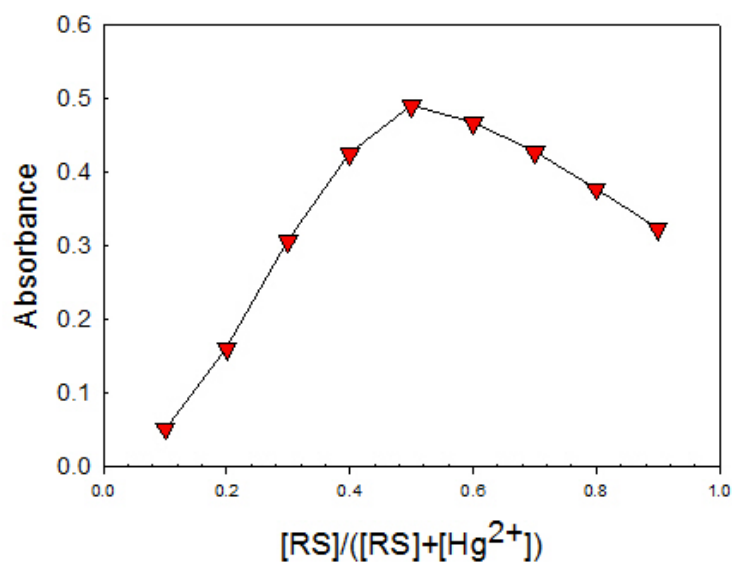

**Figure S8** Job's plot for RS and  $\text{Hg}^{2+}$  complexation (the total concentration of RS and  $\text{Hg}^{2+}$  was  $50 \mu\text{M}$ .  $\lambda = 558\text{nm}$ )

### Calculation of Association Constant

The association constant was determined from the fluorescence titration data according to a reported method<sup>[1]</sup> for a 1:1 metal-ligand binding mode. If a 1:1 metal-ligand complex is formed between a metal ion and a ligand, one can describe the equilibrium as follows:

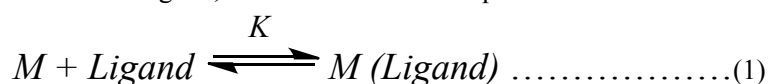

Where M and M(Ligand) denote a metal ion and its complex, respectively. The corresponding association constant, K, can be expressed as follows:

$$K = \frac{[M(Ligand)]}{[Ligand][M]} \dots\dots\dots(2)$$

A response function for M is given below following the mass law:

$$\frac{\alpha}{1-\alpha} = \frac{1}{KC_T[M]} \dots\dots\dots(3)$$

where  $C_T$  denotes the total concentration of the ligand in the system,  $\alpha$  defined as the ratio between the free ligand concentration ( $[C]$ ) and the total concentration of ligand  $C_T$ :

$$\alpha = \frac{[C]}{C_T} \dots\dots\dots(4)$$

$\alpha$  can be determined from the emission changes in the presence of different concentrations of M:

$$\alpha = \frac{F - F_{\max}}{F_{\min} - F_{\max}} \dots\dots\dots(5)$$

where  $F_{\max}$  and  $F_{\min}$  are the limiting emission values for  $\alpha = 1$  (in the absence of M) and  $\alpha = 0$  (the ligand is completely complexed with M), respectively.

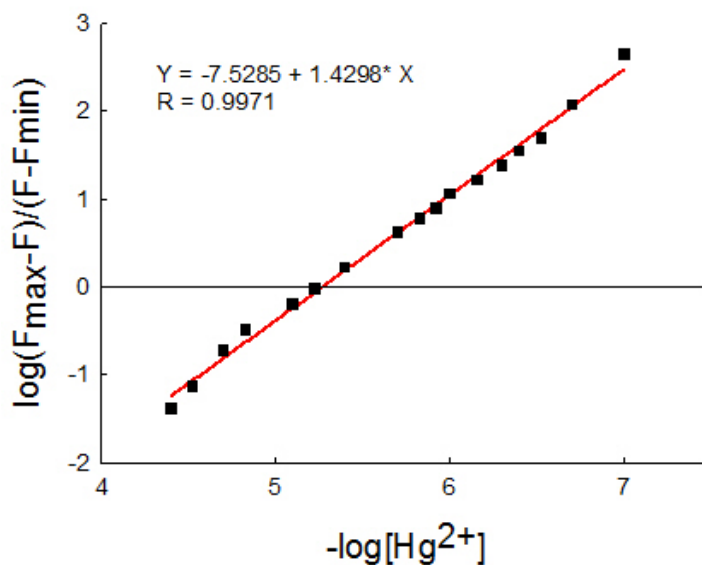

**Figure S9.** The bind constant of sensor RS and  $Hg^{2+}$  in  $CH_3CN/H_2O$ , 5:5, V/V.  $K=3.2 \times 10^7$ .  $\text{Log}K=7.5$ .

### References

[1] R. Yang, K. Li, K. Wang, F. Zhao, N. Li, F. Liu, *Anal. Chem.* 2003, 75, 612-621.

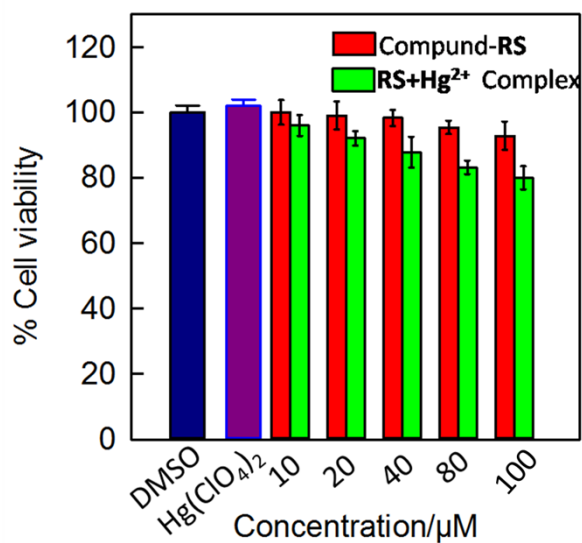

Figure S10 MTT assay to determine the cytotoxic effect of compound RS and RS-Hg<sup>2+</sup> complex in HeLa cells.

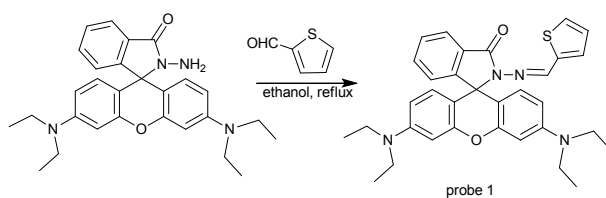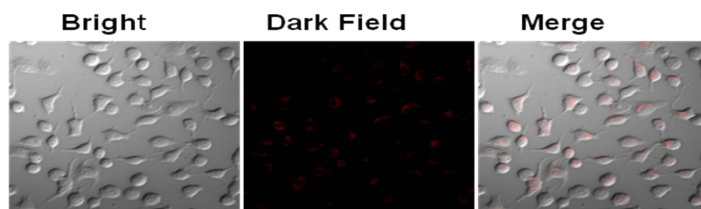

Figure 11. Fluorescence microscopic images of HeLa cells: treating with 100 μM probe 1 and after addition 100 μM of Hg<sup>2+</sup> (under green light) to the probe 1 treated cells.

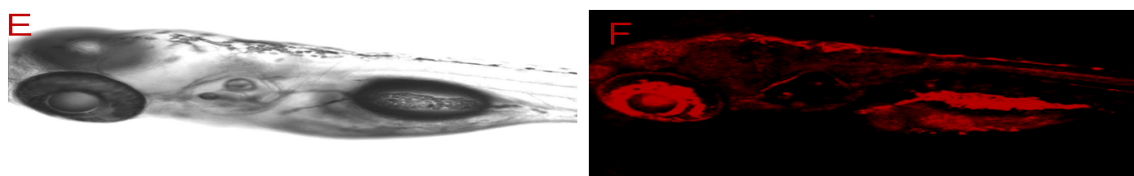

Figure 11. Bright-field (E) and Fluorescence microscopic (F) images of three-day-old zebrafish incubated with Hg<sup>2+</sup> (20 μM) and after addition of RS (20 μM).

C:\Xcalibur\data\zhq-130604-456

06/04/2013 09:55:33 AM

zhq-130604-456 #22 RT: 0.40 AV: 1 SB: 3 0.06-0.09 NL: 4.08E7  
T: + c ESI ms [ 50.00-1000.00]

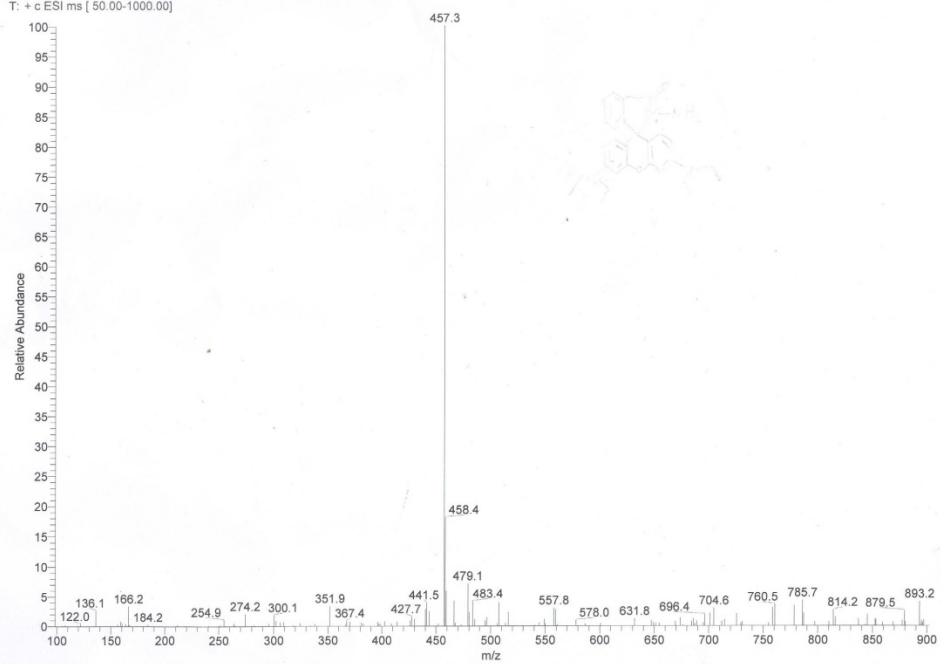

Ms of compound Rhodamine-NHNH<sub>2</sub>

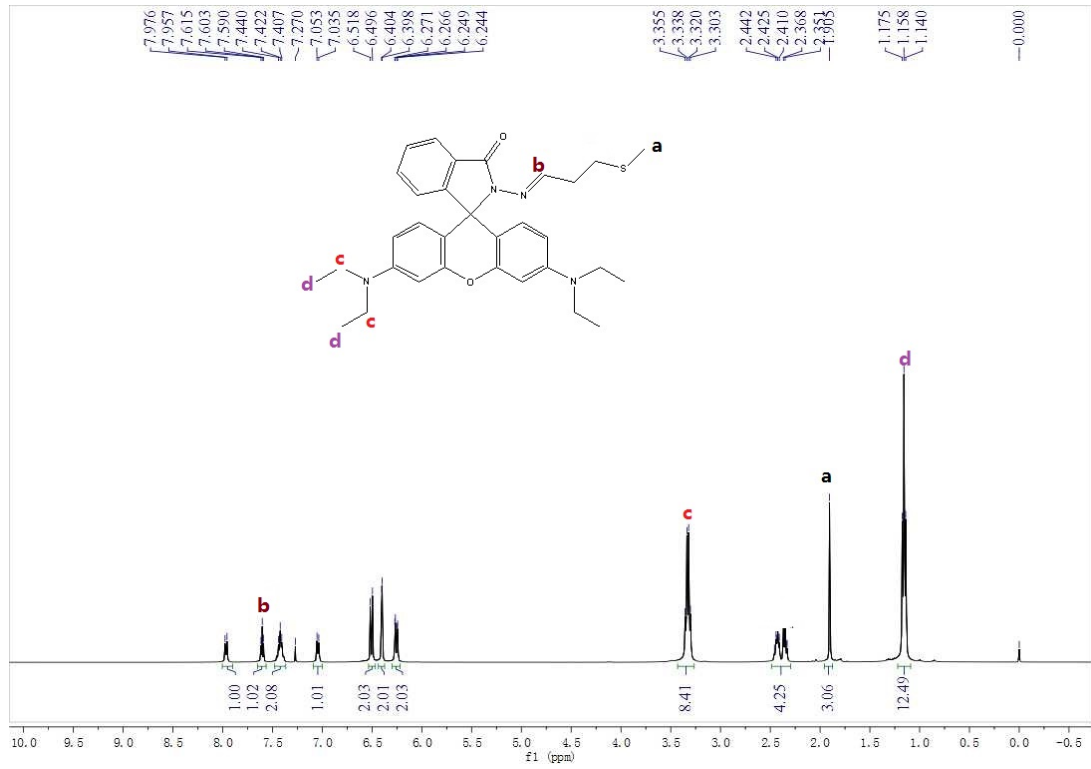

**<sup>1</sup>H NMR of RS in CDCl<sub>3</sub>**

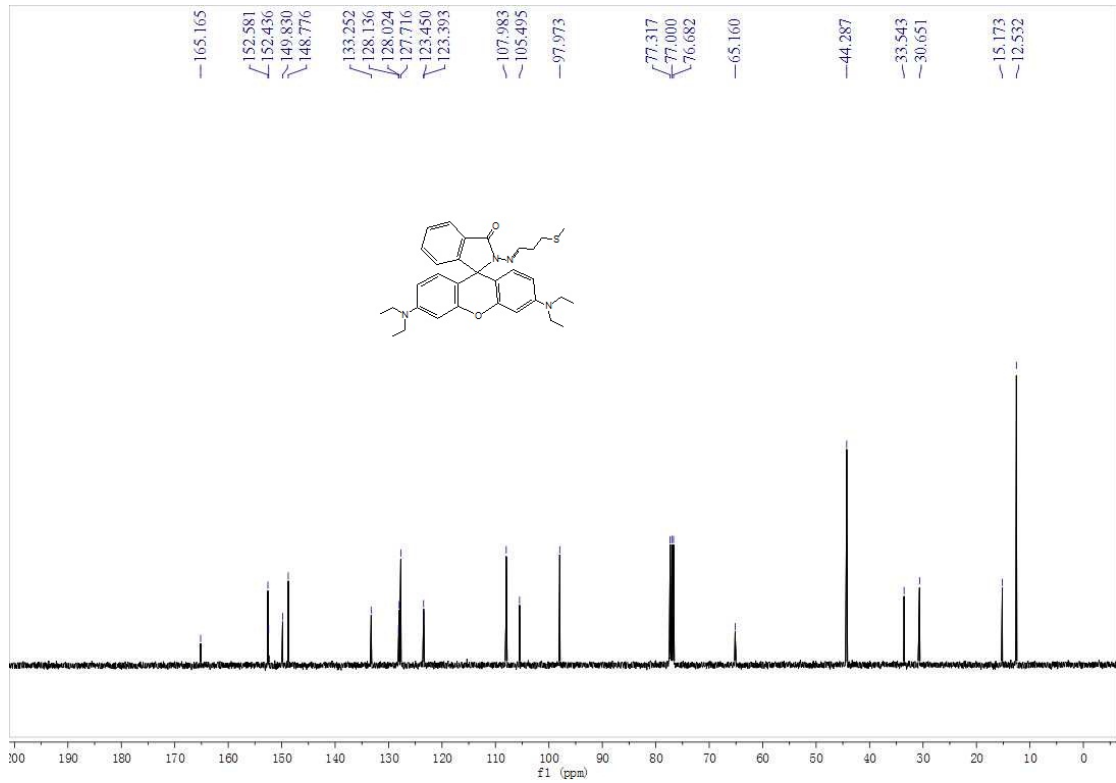

**<sup>13</sup>C NMR of RS in CDCl<sub>3</sub>**



zhq-150114-542 #23 RT: 0.50 AV: 1 SB: 3 0.02-0.06 NL: 6.96E6  
T: + c ESI Full ms [ 50.00-1200.00]

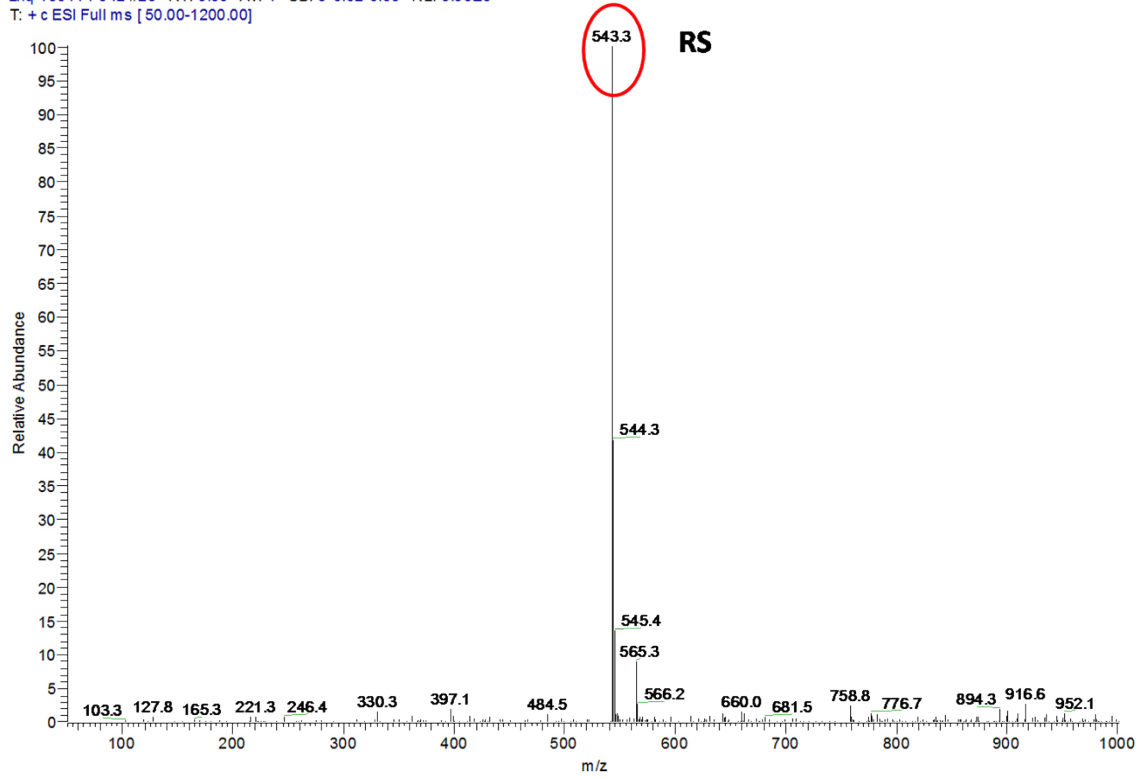

Ms of compound RS

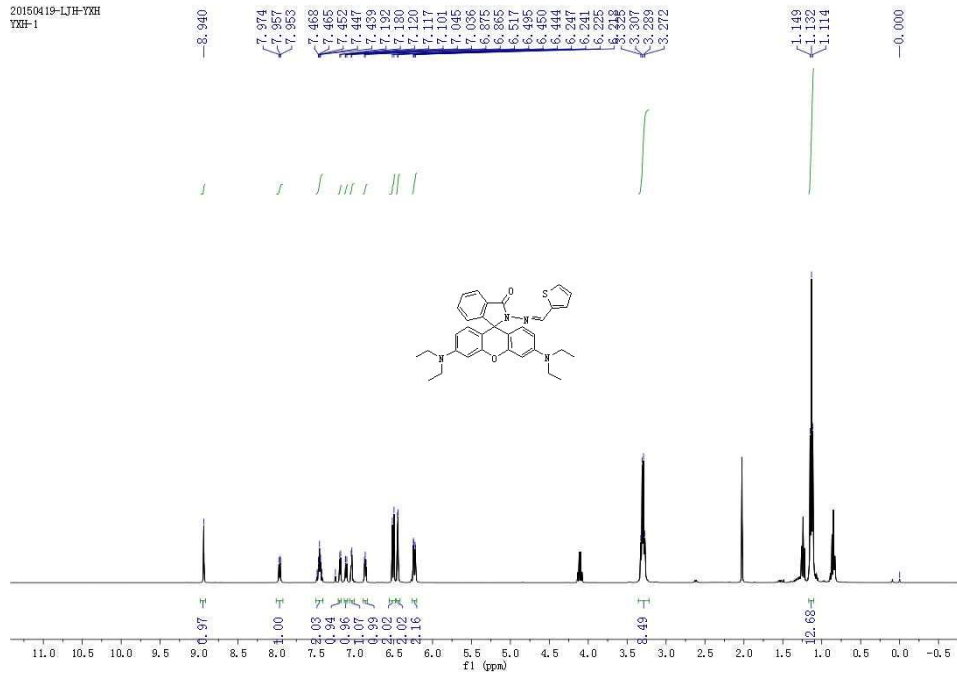

<sup>1</sup>H NMR (400 MHz) of probe 1 in CDCl<sub>3</sub>.

20150419-LJH-YXH  
YXH-1

- 164.493
- 163.203
- 161.228
- 148.771
- 142.168
- 141.096
- 133.105
- 129.496
- 129.281
- 128.189
- 127.821
- 126.807
- 123.740
- 123.122
- 107.797
- 105.966
- 97.804
- 77.319
- 77.000
- 76.882
- 66.102
- 44.182
- 12.480

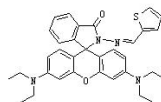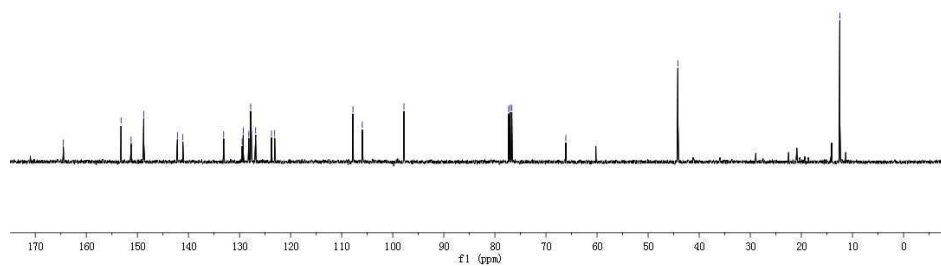

<sup>13</sup>C NMR of probe 1 in CDCl<sub>3</sub>.
